# Supplementary material for: Regional performance variation in external validation of four prediction models for severity of COVID-19 at hospital admission: An observational multi-centre cohort study
Source: bioRxiv or medRxiv preprint supplement (doi:10.1101/2021.03.26.21254390), 2021-03-26
Supplement: Supplementary file [file media-1.pdf]

## Supplementary tables

**Table S1:** Patient characteristics of the development/validation cohorts

|                           | Development cohorts |                  |                         |            |                     |             | Validation cohorts |                  |              |                  |
|---------------------------|---------------------|------------------|-------------------------|------------|---------------------|-------------|--------------------|------------------|--------------|------------------|
|                           | Xie model (n=299)   |                  | Allenbach model (n=152) |            | Zhang model (n=775) |             | KCH (n=1295)       |                  | Oslo (n=307) |                  |
| <b>Outcome</b>            | N avail             | N (%)            | N avail.                | N (%)      | N avail.            | N (%)       | N avail.           | N (%)            | N avail.     | N (%)            |
| Inhospital mortality      | --                  | 155 (51.8%)      | --                      | --         | 773                 | 33 (4.3%)   | 1244               | 333 (26.8%)      | 307          | 32 (10.4%)       |
| Mortality by day 14       | --                  | --               | 146                     | 32 (21.9%) | --                  | --          |                    |                  | 307          | 21 (6.8%)        |
| ICU/death (no time frame) | --                  | --               | --                      | --         | 773                 | 75 (9.7%)   | 1244               | 419 (33.7%)      | 307          | 66 (21.5%)       |
| ICU/death by 14 days      | --                  | --               | --                      | --         | --                  | --          | 1248               | 389 (31.2%)      | 307          | 62 (20.2%)       |
| ICU by day 14             | --                  | --               | 146                     | 17 (11.6%) | --                  | --          |                    |                  | 307          | 49 (15.9%)       |
| <b>Demographics</b>       | N avail             | N (%)            | N avail.                | N (%)      | N avail.            | N (%)       | N avail.           | N (%)            | N avail.     | N (%)            |
| Age (median [IQR])        | --                  | 65.0 [54.0-73.0] | --                      | 77 [60-83] | 775                 | 61 (50-68)  | 1295               | 69.0 [56.0-81.9] | 307          | 60.0 [48.0-73.0] |
| Sex (male)                | --                  | 144 (48.2%)      | 152                     | 91 (59.9%) | 775                 | 379 (48.9%) | 1295               | 767 (59%)        | 307          | 175 (57.0%)      |
| Non-White ethnicity       | --                  | --               | 140                     | 50 (35.7%) | --                  | --          | 961                | 418 (43%)        | --           | --               |
| <b>Comorbidities</b>      | N avail             | N (%)            | N avail.                | N (%)      | N avail.            | N (%)       | N avail.           | N (%)            | N avail.     | N (%)            |
| Hypertension              | --                  | 127 (42.6 %)     | 152                     | 82 (53.9%) | 771                 | 239 (30.8%) | 1295               | 700 (54%)        | 307          | 104 (34%)        |
| Diabetes mellitus         | --                  | 55 (18.5%)       | 152                     | 37 (24.3%) | 771                 | 106 (13.7%) | 1295               | 455 (35%)        | 307          | 64 (21%)         |
| Heart Failure             | --                  | 13 (4.4%)        | --                      | --         | --                  | --          | 1295               | 96 (7%)          |              |                  |
| Heart disease             | --                  | --               | --                      | --         | 771                 | 85 (11.0%)  | --                 | --               |              | --               |
| Ischaemic Heart Diseases  | --                  | --               | 152                     | 35 (23%)   | --                  | --          | 1295               | 177 (14%)        | 307          | 33 (11%)         |
| Chronic lung disease      | --                  | --               | --                      | --         | 771                 | 48 (6.2%)   | --                 | --               | 307          | 83 (27%)         |
| COPD                      | --                  | 15 (5.0%)        | 151                     | 12 (7.9%)  | --                  | --          | 1295               | 137 (11%)        | --           | --               |
| Chronic Kidney Disease    | --                  | --               | --                      | --         | 771                 | 25 (3.2%)   | 1295               | 215 (17%)        | 307          | 20 (7%)          |
| ACE/A2 inhibitor          | --                  | --               | 152                     | 28 (18.4%) | --                  | --          | --                 | --               | 307          | 62 (20%)         |

|                                        |         |                     |          |                         |          |                  |          |                     |          |                     |
|----------------------------------------|---------|---------------------|----------|-------------------------|----------|------------------|----------|---------------------|----------|---------------------|
| Smoking                                | --      | 10 (3.4%)           | 152      | 10 (6.6%)               | --       | --               | --       | --                  | 307      | 14 (5%)             |
| <b>Blood biomarker</b>                 | N avail | Median (IQR)        | N avail. | Median [IQR]            | N avail. | Median [IQR]     | N avail. | N (%)               | N avail. | N (%)               |
| Albumin (g/L)                          | --      | 33.4 [29.9-36.2]    | --       | --                      | --       | --               | --       | --                  | 263      | 39.0 [37.0-42.0]    |
| C-reactive protein (CRP, mg/L)         | --      | 65.3 [27.4-113.9]   | 152      | 74.5 [30.9-135.1]       | 684      | 2.7 [0.9-14.1]   | 1203     | 87.4 [41.0-154.3]   | 307      | 44.0 [14.0-97.0]    |
| Creatinine, U/L                        | --      | 74.0 [58.0-95.0]    | --       | --                      | 728      | 63.9 [54.1-76.4] | 1200     | 93.0 [71.8-133.2]   | 307      | 80.0 [64.0-99.0]    |
| Lymphocyte count (x10 <sup>9</sup> /L) | --      | 0.75 [0.5-1.11]     | --       | *                       | 743      | 1.4 [1.1-1.9]    | 1187     | 1.0 [0.7-1.3]       | 295      | 1.1 [0.7-1.5]       |
| Neutrophil count (x10 <sup>9</sup> /L) | --      | --                  | 152      | 4.4 (3.0-7.0)           | 739      | 3.5 (2.7-4.9)    | 1186     | 5.6 [3.9-7.8]       | 295      | 4.2 [3.1-6.3]       |
| Platelet count (x10 <sup>9</sup> /L)   | --      | 179.5 [137.3-247.8] | --       | --                      | 732      | 224 [180-274]    | 1188     | 212.0 [163.0-272.0] | 307      | 210.0 [165.0-269.0] |
| LDH (U/L)                              | --      | 384.0 [264.0-541.0] | --       | 364 [284-444]           | --       | --               | 157      | 405.0 [307.0-553.0] | 269      | 255.0 [191.5-328.5] |
| <b>Physiological parameters</b>        | N avail | Median (%)          | N avail. | Median (%)              | N avail. | Median (%)       | N avail. | N (%)               | N avail. | N (%)               |
| Oxygen saturation                      | --      | 95.0 [90.0-98.0]    | 152      | 93 (90-96) <sup>1</sup> | --       | --               | 858      | 96.0 [95.0-98.0]    | 307      | 95.0 [92.0-97.0]    |
| Oxygen flow rate (L/min)               | --      | --                  | 152      | 2 (2-4)                 | --       | --               | 880      | 1.0 [0.0-4.0]       | 220      | 0.0 [0.0-2.0]       |
| Systolic blood pressure                | --      | 132.5 [118.0-145.0] | --       | --                      | --       | --               | 862      | 124.0 [112.0-139.0] | 306      | 127 [116.0-141.0]   |
| <b>Symptoms</b>                        | N avail | N (%)               | N avail  | N (%)                   | N avail  | N (%)            | N avail. | N (%)               | N avail. | N (%)               |
| Fever                                  | --      | --                  | --       | --                      | 773      | 532 (68.6%)      | --       | --                  | 307      | 194 (63.2%)         |
| Cough                                  | --      | --                  | --       | *                       | 773      | 528 (68.1%)      | --       | --                  | 307      | 218 (71.0%)         |
| Fatigue                                | --      | --                  | 150      | 70 (46.7%)              | 773      | 421 (54.3%)      | --       | --                  | 307      | 109 (35.5%)         |
| Dyspnoe                                | --      | --                  | 150      | 102 (67.5%)             | 773      | 355 (45.8%)      | --       | --                  | 307      | 202 (65.8%)         |
|                                        |         |                     |          |                         |          |                  | --       | --                  |          |                     |

<sup>1</sup>. Measured without oxygen

\* other definition of this variable

Table S2: OUH cohort AUROC results show similarities with different imputation methods.  
 KNN; K-nearest neighbor, RF; Random forrest, GP; Gaussian Process Method, BR; Bayesian Rigde.

|                         | Xie model        | Allenbach        | Zhang1           | Zhang2           |
|-------------------------|------------------|------------------|------------------|------------------|
| Single imputation; KNN  | 0.87 [0.79-0.95] | 0.81 [0.74-0.88] | 0.72 [0.62-0.82] | 0.77 [0.70-0.84] |
| Single imputation; RF   | 0.86 [0.78-0.94] | 0.81 [0.74-0.88] | 0.72 [0.62-0.82] | 0.77 [0.70-0.84] |
| Multiple imputation; BR | 0.86 [0.78-0.95] | 0.81 [0.74-0.88] | 0.72 [0.62-0.82] | 0.77 [0.70-0.84] |
| Multiple imputation; GP | 0.85 [0.76-0.95] | 0.80 [0.73-0.87] | 0.72 [0.62-0.82] | 0.77 [0.70-0.84] |
