# Supplementary material for: Regional performance variation in external validation of four prediction models for severity of COVID-19 at hospital admission: An observational multi-centre cohort study
Source: bioRxiv or medRxiv preprint supplement (doi:10.1101/2021.03.26.21254390), 2021-03-26

## Supplementary Figures

**Figure S1: Flowchart of the included patients at OUH for validation of the four prediction models**

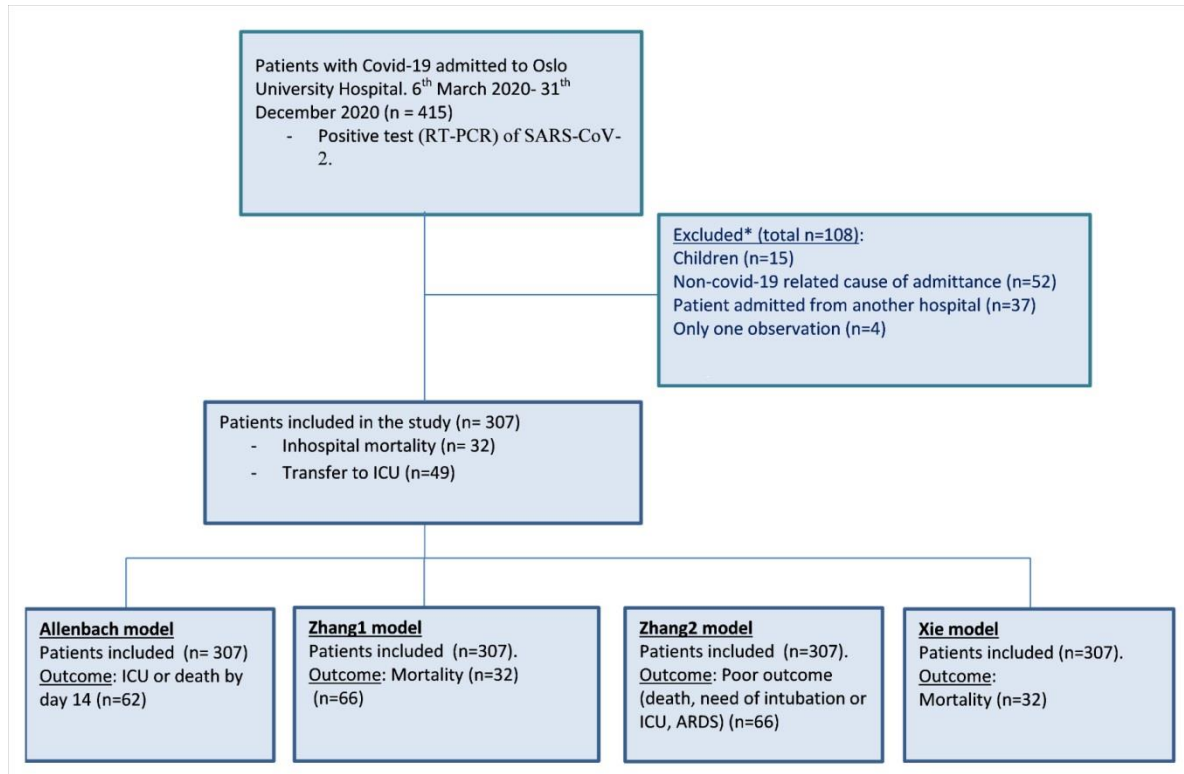

**Figure S2: Flowchart of included patientes in the KCH cohort for validation of the four predcition models**

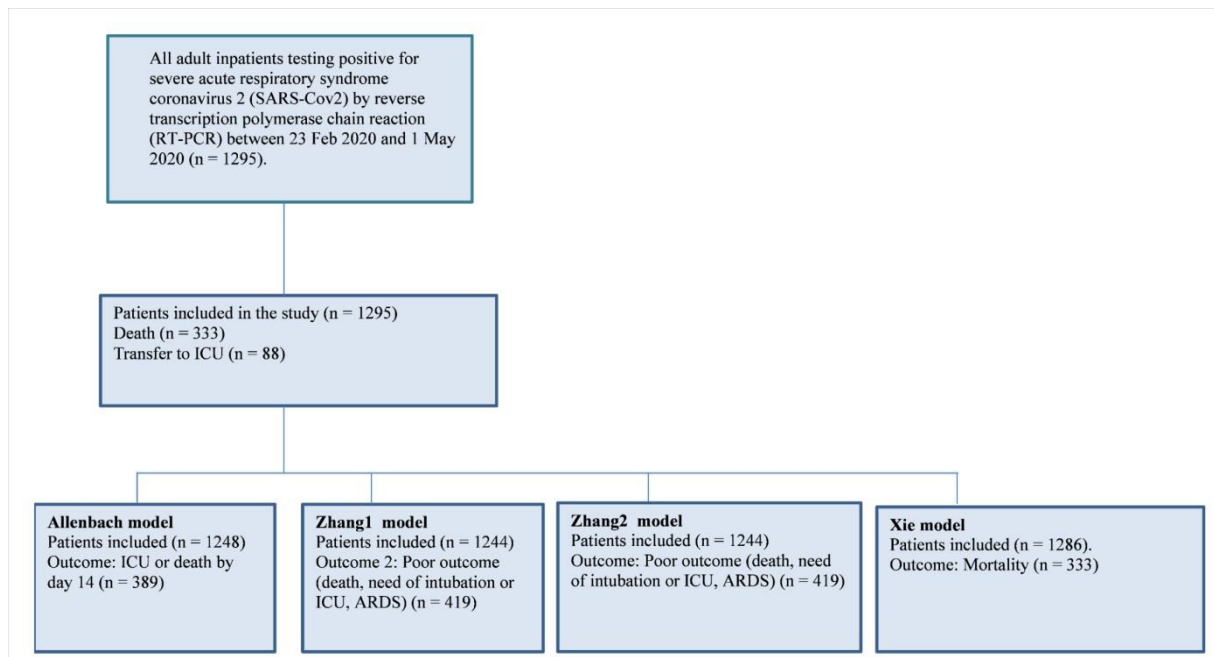

**Figure S3: Results for calibration of the Xie and Allenbach models at KCH and OUH before and after recalibration**

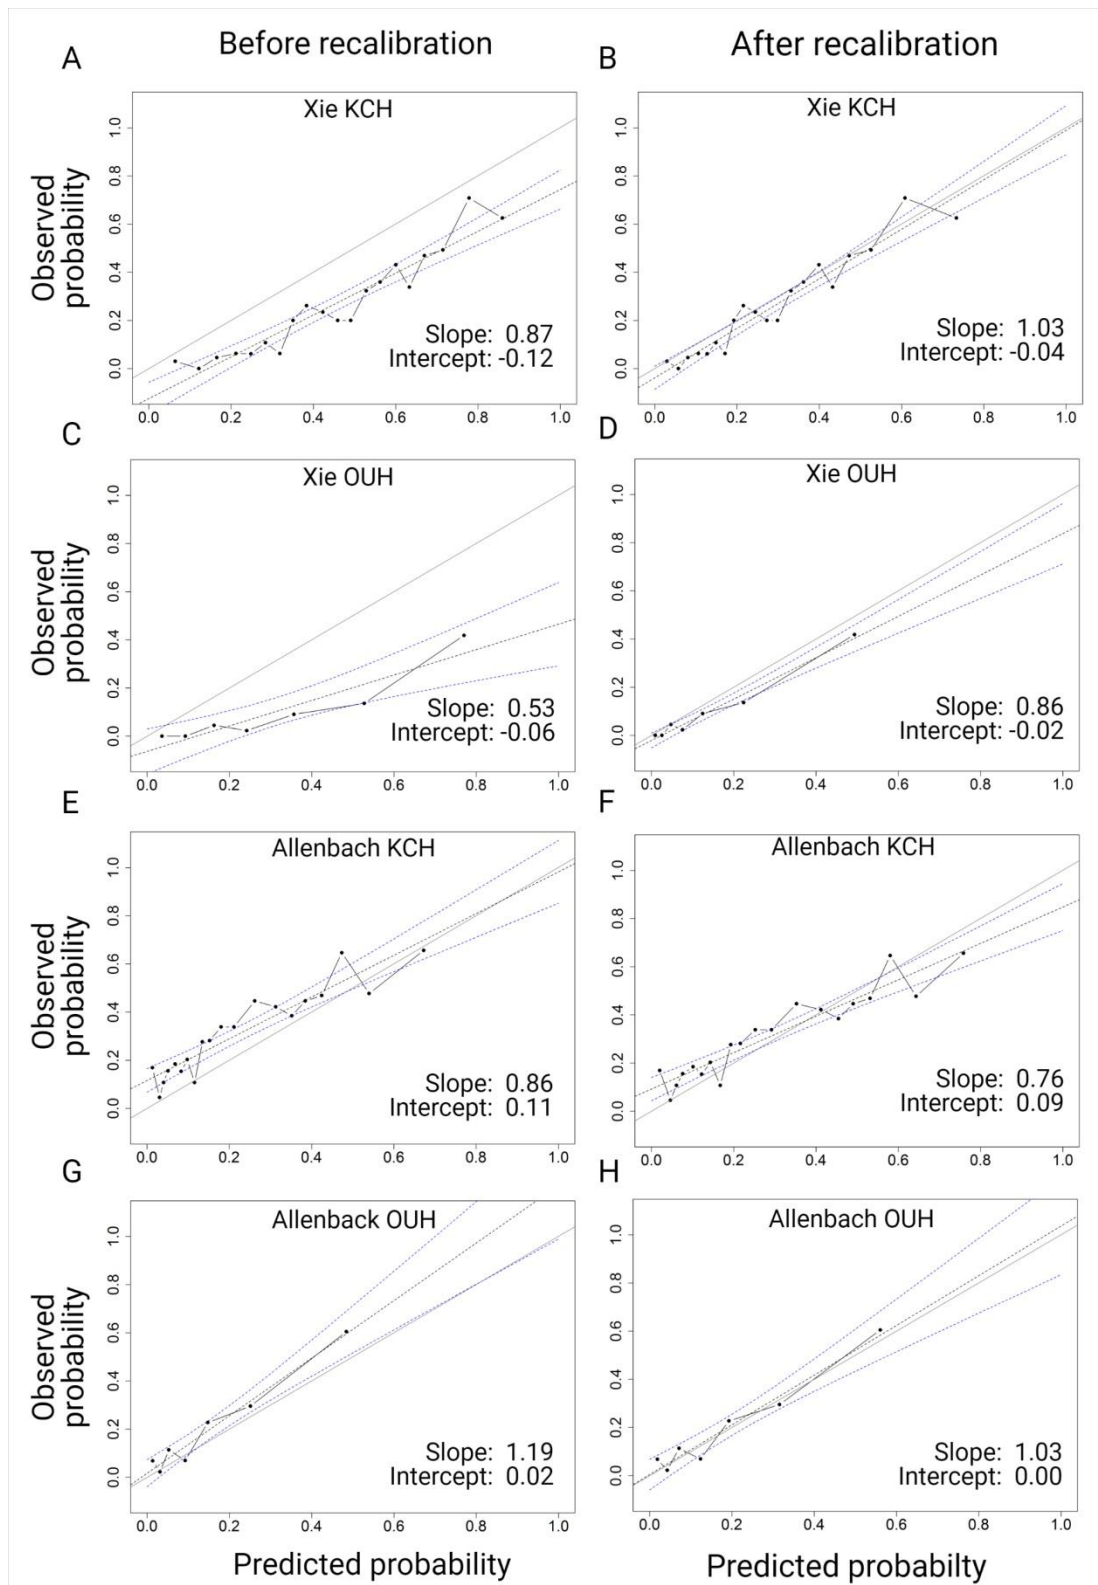

Supplement: Supplementary file [file media-2.pdf]
